# Supplementary material
Source: HighWire-hosted journal article supplement (https://qdcxjkg.com/highwire/filestream/113266/field_highwire_adjunct_files/0/Supplementary_material.pdf)
Supplement: Supplementary_material.pdf [file Supplementary_material.pdf]

**Table S1.** Differences between Spanish children included in the main analyses (N=1342) and Spanish children excluded (N=569).

| <b>Characteristics</b>                 | <b>Inclusion</b>                                     |                                                   | <b>p-value</b> |
|----------------------------------------|------------------------------------------------------|---------------------------------------------------|----------------|
|                                        | <b>Not included in<br/>main analysis<br/>(N=569)</b> | <b>Included in<br/>main analysis<br/>(N=1342)</b> |                |
| <b>Characteristics of the children</b> |                                                      |                                                   |                |
| Male Sex (%)                           | 48.1                                                 | 51.8                                              | 0.18           |
| N missing                              | 157                                                  | 3                                                 |                |
| Preterm (<37 weeks, %)                 | 6.0                                                  | 3.8                                               | 0.05           |
| N missing                              | 84                                                   | 2                                                 |                |
| Low birth-weight (<2500g, %)           | 7.9                                                  | 5.3                                               | 0.04           |
| N missing                              | 89                                                   | 4                                                 |                |
| Predominant breastfeeding (%)          |                                                      |                                                   | <0.001         |
| 0 weeks                                | 26.8                                                 | 19.2                                              |                |
| 1-16 weeks                             | 37.5                                                 | 32.7                                              |                |
| 17-24 weeks                            | 27.7                                                 | 36.1                                              |                |

|                                        |      |      |        |
|----------------------------------------|------|------|--------|
| >24 weeks                              | 7.9  | 12.1 |        |
| N missing                              | 241  | 47   |        |
|                                        |      |      | <0.001 |
| Day-care attendance                    | 22.5 | 34.3 |        |
| N missing                              | 267  | 14   |        |
|                                        |      |      |        |
| Region (%)                             |      |      | <0.001 |
| Gipuzkoa (N=638)                       | 19.3 | 37.3 |        |
| Sabadell (N=657)                       | 20.7 | 33.9 |        |
| Valencia (N=855)                       | 59.9 | 28.8 |        |
| N missing                              | 0    | 0    |        |
|                                        |      |      |        |
| LRTIs <sup>†</sup> at 12/14 months (%) | 32.1 | 35.4 | 0.32   |
| N missing                              | 329  | 0    |        |
|                                        |      |      |        |
| Wheeze at 12/14 months (%)             | 24.6 | 33.6 | <0.001 |
| N missing                              | 228  | 0    |        |

### **Characteristics of the mother**

Organochlorine concentrations in

|                                        |             |             |        |
|----------------------------------------|-------------|-------------|--------|
| maternal serum                         |             |             |        |
| DDE (GM, GSD)                          | 111.6 (2.2) | 119.4 (2.2) | 0.21   |
| HCB (GM, GSD) *                        | 36.8 (2.3)  | 44.3 (2.3)  | <0.001 |
| ΣPCBs (GM, GSD) <sup>‡</sup>           | 101.3 (1.8) | 112.4 (1.8) | <0.001 |
| N missing                              | 314         | 0 (2)       |        |
|                                        |             |             |        |
| Age, years (mean, SD)                  | 29.8 (4.6)  | 30.9 (4.0)  | <0.001 |
| N missing                              | 0           | 0           |        |
|                                        |             |             |        |
| Pre-pregnancy weight, kg<br>(mean, SD) | 61.8 (13.2) | 62.7 (11.7) | <0.001 |
| N missing                              | 0           | 0           |        |
|                                        |             |             |        |
| Social class (%)                       |             |             | 0.08   |
| Non-manual jobs                        | 71.5        | 76.2        |        |
| Manuals jobs                           | 27.2        | 23.0        |        |
| Unknown or unclassifiable              | 1.2         | 0.8         |        |
| N missing                              | 0           | 0           |        |
|                                        |             |             |        |
| Education (%)                          |             |             | <0.001 |

|                                             |              |              |        |
|---------------------------------------------|--------------|--------------|--------|
| Primary school                              | 33.1         | 23.6         |        |
| Secondary                                   | 42.3         | 39.7         |        |
| University                                  | 24.7         | 36.7         |        |
| N missing                                   | 1            | 3            |        |
| Smoking during pregnancy (%)                | 26.9         | 16.8         | <0.001 |
| N missing                                   | 85           | 19           |        |
| Smoking during the first year (%)           | 35.4         | 26.6         | 0.02   |
| N missing                                   | 267          | 17           |        |
| Maternal allergy and/or asthma (%)          | 27.0         | 27.2         | 0.92   |
| N missing                                   | 2            | 1            |        |
| Parity (First child, %)                     | 57.3         | 55.1         | 0.38   |
| N missing                                   | 0            | 1            |        |
| <b>Diet of the mother (g/day, mean, SD)</b> |              |              |        |
| Meat                                        | 116.4 (48.7) | 113.2 (42.0) | 0.14   |
| Fish                                        | 60.7 (32.1)  | 66.8 (30.0)  | <0.001 |

|                    |               |               |       |
|--------------------|---------------|---------------|-------|
| Vegetables & fruit | 484.4 (240.3) | 516.3 (212.9) | 0.004 |
| N missing          | 0             | 0             |       |

DDE= dichlorodiphenyldichloroethylene, HCB= hexachlorobenzene, PCBs= polychlorinated biphenyls.

GM= Geometric Mean, SD=standard deviation.

The percentage of missing values within the non-included population is much higher than in the included population because in non-included already a 34.2% of the children either died or withdrew the study at birth or either did not attend the visit at 12/14 months.

<sup>†</sup>This is according to the final definition of having LRTI used in this study.

\*One child was excluded from the analysis with HCB because it was an outlier (N=1341).

<sup>‡</sup>Two children had no information for PCBs within the Spanish population and one was excluded from the analysis with ΣPCBs because it was an outlier (N=1339).

**Table S2.** Associations between confounders and LRTIs and wheezing after adjusting for all confounders.

|                 | DDE (N=1342) |              |         | sumPCBs (N=1339) |              |         |
|-----------------|--------------|--------------|---------|------------------|--------------|---------|
|                 | RR           | 95%CI        | p-value | RR               | 95%CI        | p-value |
| <b>LRTIs</b>    |              |              |         |                  |              |         |
| Q1              | 1.16         | (0.94, 1.43) | 0.16    | 0.98             | (0.80, 1.20) | 0.83    |
| Q2              | 1.33         | (1.08, 1.62) | 0.01    | 0.94             | (0.75, 1.17) | 0.56    |
| Q3              | 1.20         | (0.96, 1.51) | 0.11    | 0.84             | (0.65, 1.08) | 0.17    |
| Gipuzkoa region | 0.93         | (0.79, 1.10) | 0.40    | 0.94             | (0.79, 1.13) | 0.52    |

|                                              |      |              |      |      |              |      |
|----------------------------------------------|------|--------------|------|------|--------------|------|
| Valencia region                              | 0.72 | (0.59, 0.88) | 0.00 | 0.78 | (0.64, 0.96) | 0.02 |
| Male sex                                     | 1.29 | (1.12, 1.49) | 0.00 | 1.27 | (1.10, 1.47) | 0.00 |
| Age of the mother                            | 0.98 | (0.96, 1.00) | 0.06 | 0.99 | (0.97, 1.01) | 0.51 |
| Pre-pregnancy weight of the mother           | 1.00 | (1.00, 1.01) | 0.10 | 1.00 | (1.00, 1.01) | 0.19 |
| Allergic or asthmatic mother                 | 1.25 | (1.08, 1.45) | 0.00 | 1.26 | (1.09, 1.46) | 0.00 |
| Multiparous                                  | 1.69 | (1.45, 1.97) | 0.00 | 1.66 | (1.42, 1.94) | 0.00 |
| Maternal smoking during the 1st year of life | 1.08 | (0.88, 1.32) | 0.48 | 1.08 | (0.88, 1.32) | 0.48 |
| Maternal smoking during pregnancy            | 1.05 | (0.83, 1.34) | 0.69 | 1.05 | (0.82, 1.33) | 0.72 |
| Manual jobs                                  | 1.09 | (0.92, 1.29) | 0.33 | 1.07 | (0.90, 1.28) | 0.42 |
| Unclassifiable                               | 1.06 | (0.46, 2.42) | 0.89 | 1.03 | (0.46, 2.35) | 0.93 |
| Breastfeeding 1-16 weeks                     | 0.99 | (0.81, 1.21) | 0.91 | 0.97 | (0.80, 1.19) | 0.80 |
| Breastfeeding 17-24 weeks                    | 0.89 | (0.73, 1.09) | 0.28 | 0.88 | (0.72, 1.07) | 0.21 |
| Breastfeeding >24 weeks                      | 1.04 | (0.81, 1.33) | 0.76 | 1.03 | (0.81, 1.32) | 0.79 |
| Day care attendance                          | 1.43 | (1.24, 1.67) | 0.00 | 1.45 | (1.25, 1.69) | 0.00 |

### **Wheezing**

|                 |      |              |      |      |              |      |
|-----------------|------|--------------|------|------|--------------|------|
| Q1              | 1.10 | (0.88, 1.36) | 0.41 | 1.02 | (0.84, 1.25) | 0.83 |
| Q2              | 1.30 | (1.06, 1.59) | 0.01 | 0.96 | (0.78, 1.19) | 0.73 |
| Q3              | 1.11 | (0.89, 1.40) | 0.35 | 0.85 | (0.67, 1.07) | 0.17 |
| Gipuzkoa region | 0.97 | (0.81, 1.15) | 0.70 | 0.99 | (0.82, 1.18) | 0.89 |

|                                              |      |              |      |      |              |      |
|----------------------------------------------|------|--------------|------|------|--------------|------|
| Valencia region                              | 0.69 | (0.56, 0.85) | 0.00 | 0.73 | (0.59, 0.90) | 0.00 |
| Male sex                                     | 1.31 | (1.13, 1.52) | 0.00 | 1.29 | (1.11, 1.50) | 0.00 |
| Allergic or asthmatic mother                 | 1.16 | (0.99, 1.35) | 0.07 | 1.17 | (1.00, 1.38) | 0.05 |
| Multiparous                                  | 1.59 | (1.37, 1.84) | 0.00 | 1.61 | (1.39, 1.88) | 0.00 |
| Maternal smoking during the 1st year of life | 1.08 | (0.87, 1.33) | 0.48 | 1.07 | (0.86, 1.32) | 0.55 |
| Maternal smoking during pregnancy            | 1.30 | (1.03, 1.65) | 0.03 | 1.30 | (1.02, 1.65) | 0.03 |
| Manual jobs                                  | 1.23 | (1.04, 1.46) | 0.02 | 1.22 | (1.03, 1.44) | 0.02 |
| Unclassifiable                               | 0.55 | (0.15, 2.09) | 0.38 | 0.57 | (0.15, 2.15) | 0.40 |
| Breastfeeding 1-16 weeks                     | 1.05 | (0.86, 1.28) | 0.66 | 1.02 | (0.83, 1.24) | 0.86 |
| Breastfeeding 17-24 weeks                    | 0.78 | (0.63, 0.97) | 0.02 | 0.77 | (0.62, 0.94) | 0.01 |
| Breastfeeding >24 weeks                      | 0.88 | (0.67, 1.15) | 0.34 | 0.87 | (0.66, 1.14) | 0.31 |
| Day care attendance                          | 1.50 | (1.28, 1.75) | 0.00 | 1.52 | (1.30, 1.78) | 0.00 |

DDE= dichlorodiphenyldichloroethylene, PCBs= polychlorinated biphenyls.

**Table S3.** Number of children (N), cases of LRTIs during the first 12-14 months of life (%) and adjusted relative risk (RR (95% Confidence Interval)) for continuous exposure and for each quartile of DDE exposure within the Spanish study population by region (N=1342<sup>\*†</sup>).

| Gipuzkoa (N=500) |            |       | Sabadell (N=455) |            |       | Valencia (N=387) |            |       |
|------------------|------------|-------|------------------|------------|-------|------------------|------------|-------|
| N                | Adjusted   | p-    | N                | Adjusted   | p-    | N                | Adjusted   | p-    |
| (% LRTI          | RR (95%CI) | value | (% LRTI          | RR (95%CI) | value | (% LRTI          | RR (95%CI) | value |
| cases)           |            |       | cases)           |            |       | cases)           |            |       |

**DDE**

|             |               |                      |      |               |                      |      |               |                      |      |
|-------------|---------------|----------------------|------|---------------|----------------------|------|---------------|----------------------|------|
| Continuous  | 500<br>(36.4) | 1.16<br>(0.98, 1.37) | 0.08 | 455<br>(39.6) | 1.08<br>(0.92, 1.27) | 0.35 | 387<br>(29.2) | 1.01<br>(0.82, 1.26) | 0.9  |
| <72.6       | 172 (31.4)    | 1                    |      | 129<br>(34.9) | 1                    |      | 35<br>(28.6)  | 1                    |      |
| 72.6-115.9  | 149 (38.3)    | 1.25<br>(0.93, 1.69) | 0.14 | 109<br>(38.5) | 1.09<br>(0.80, 1.49) | 0.57 | 77<br>(26.0)  | 0.99<br>(0.52, 1.87) | 0.97 |
| 115.5-191.7 | 107 (40.2)    | 1.35<br>(0.98, 1.86) | 0.07 | 127<br>(43.3) | 1.15<br>(0.85, 1.56) | 0.37 | 102<br>(35.3) | 1.34<br>(0.76, 2.35) | 0.31 |
| >191.7      | 72<br>(38.9)  | 1.45<br>(1.01, 2.08) | 0.04 | 90<br>(42.2)  | 1.17<br>(0.83, 1.66) | 0.36 | 173<br>(27.2) | 0.94<br>(0.53, 1.66) | 0.83 |

**HCB\***

|            |               |                      |      |               |                      |      |               |                      |      |
|------------|---------------|----------------------|------|---------------|----------------------|------|---------------|----------------------|------|
| Continuous | 500<br>(36.4) | 1.10<br>(0.93, 1.31) | 0.28 | 455<br>(39.6) | 1.02<br>(0.85, 1.23) | 0.82 | 386<br>(29.3) | 1.02<br>(0.85, 1.22) | 0.84 |
| <26.4      | 166<br>(36.1) | 1                    |      | 114<br>(39.5) | 1                    |      | 56<br>(25.0)  | 1                    |      |
| 26.4-46.4  | 152<br>(34.2) | 0.98<br>(0.73, 1.33) | 0.92 | 137<br>(37.3) | 0.94<br>(0.70, 1.26) | 0.66 | 46<br>(30.4)  | 1.09<br>(0.57, 2.07) | 0.79 |



|                          |        |              |      |        |              |      |        |              |      |
|--------------------------|--------|--------------|------|--------|--------------|------|--------|--------------|------|
| 46.4-79.0                | 118    | 1.26         | 0.13 | 122    | 0.91         | 0.57 | 95     | 1.13         | 0.66 |
|                          | (42.4) | (0.93, 1.71) |      | (36.9) | (0.65, 1.26) |      | (30.5) | (0.65, 1.94) |      |
| >79.0                    | 64     | 1.05         | 0.82 | 82     | 1.01         | 0.94 | 189    | 1.02         | 0.93 |
|                          | (31.3) | (0.68, 1.26) |      | (47.6) | (0.70, 1.46) |      | (29.6) | (0.60, 1.74) |      |
| <b>ΣPCBs<sup>†</sup></b> |        |              |      |        |              |      |        |              |      |
| Continuous               | 498    | 0.86         | 0.31 | 455    | 0.99         | 0.97 | 386    | 1.13         | 0.38 |
|                          | (36.4) | (0.65, 1.14) |      | (39.6) | (0.74, 1.33) |      |        | (0.86, 1.48) |      |
| <79.4                    | 69     | 1            |      | 204    | 1            |      | 62     | 1            |      |
|                          | (42.0) |              |      | (37.3) |              |      | (35.5) |              |      |
| 79.4-113.7               | 126    | 0.96         | 0.83 | 129    | 0.95         | 0.74 | 80     | 0.70         | 0.16 |
|                          | (36.5) | (0.67, 1.38) |      | (41.9) | (0.72, 1.27) |      | (26.3) | (0.43, 1.15) |      |
| 113.7-158.6              | 134    | 1.03         | 0.86 | 86     | 0.95         | 0.75 | 115    | 0.63         | 0.07 |
|                          | (41.0) | (0.71, 1.50) |      | (41.9) | (0.67, 1.33) |      | (24.4) | (0.38, 1.04) |      |
| >158.6                   | 169    | 0.78         | 0.26 | 36     | 0.91         | 0.69 | 129    | 0.77         | 0.27 |
|                          | (30.2) | (0.51, 1.20) |      | (38.9) | (0.58, 1.43) |      | (31.8) | (0.49, 1.23) |      |

---

DDE= dichlorodiphenyldichloroethylene, HCB= hexachlorobenzene, PCBs= polychlorinated biphenyls.

LRTIs model adjustment: sex of the child, age and pre-pregnancy weight of the mother, allergic or asthmatic mother, parity (first child) and social class, predominant breastfeeding, maternal smoking status (during pregnancy and during the 1st year of life of the child) and day-care attendance during the first year of life.

\*One child within the Valencia region was excluded from the analysis with HCB because it was an outlier.

†Two children had no information for PCBs within the Gipuzkoa region and one from the Valencia region was excluded from the analysis with ΣPCBs because it was an outlier.

**Table S4.** Results of the linear splines using log-transformed exposures and comparison between pooled-analysis and meta-analysis results for the association between DDE exposure (continuous and by quartiles) and LRTIs.

| <b>DDE</b>   |            |                   | <b>HCB</b>   |            |                   | <b>PCB</b>   |            |                    |
|--------------|------------|-------------------|--------------|------------|-------------------|--------------|------------|--------------------|
| <b>Knots</b> | <b>(N)</b> | <b>RR (95%CI)</b> | <b>Knots</b> | <b>(N)</b> | <b>RR (95%CI)</b> | <b>Knots</b> | <b>(N)</b> | <b>RR (95%CI)</b>  |
| < 3.61       | 55         | 0.91 (0.40, 2.08) | < 3.75       | 617        | 0.93 (0.71, 1.23) | < 3.92       | 105        | 2.95 (0.66, 13.18) |
| 3.61-5.82    | 1174       | 1.37 (0.55, 3.40) | >= 3.75      | 724        | 1.38 (0.84, 2.27) | 3.92-4.84    | 679        | 0.27 (0.05, 1.6)   |
| > 5.82       | 113        | 1.10 (0.50, 2.42) |              |            |                   | >4.84-5.75   | 502        | 1.05 (0.4, 2.77)   |
|              |            |                   |              |            |                   | > 5.75       | 53         | 6.77 (0.72, 63.8)  |

Adjustment of all models: region, sex of the child, allergic or asthmatic mother, parity (first child) and social class, predominant breastfeeding, maternal smoking status (during pregnancy and during the 1st year of life of the child) and day-care attendance during the first year of life.

|                        | <b>DDE (N=1342)</b> |                        | <b>HCb<sup>#</sup> (N=1341)</b> |                        | <b>ΣPCBs<sup>†</sup> (N=1339)</b> |                        |
|------------------------|---------------------|------------------------|---------------------------------|------------------------|-----------------------------------|------------------------|
|                        | <b>RR</b>           | <b>p-value</b>         | <b>RR</b>                       | <b>p-value</b>         | <b>RR</b>                         | <b>p-value</b>         |
|                        | <b>(95%CI)</b>      | <b>Heterogeneity</b>   | <b>(95%CI)</b>                  | <b>Heterogeneity</b>   | <b>(95%CI)</b>                    | <b>Heterogeneity</b>   |
|                        |                     | <b>(meta-analysis)</b> |                                 | <b>(meta-analysis)</b> |                                   | <b>(meta-analysis)</b> |
|                        |                     |                        | <b>Continuous</b>               |                        |                                   |                        |
| <b>Pooled-analysis</b> | 1.11                |                        | 1.06                            |                        | 1.00                              |                        |
|                        | (1.00, 1.22)        |                        | (0.95, 1.17)                    |                        | (0.86, 1.18)                      |                        |
| <b>Meta-analysis</b>   | 1.09                | 0.66                   | 1.05                            | 0.81                   | 0.97                              | 0.39                   |
|                        | (0.98, 1.2)         |                        | (0.94, 1.15)                    |                        | (0.81, 1.13)                      |                        |
|                        |                     |                        | <b>Quartiles</b>                |                        |                                   |                        |
| <b>Pooled-analysis</b> |                     |                        |                                 |                        |                                   |                        |
| Q2                     | 1.16                |                        | 0.96                            |                        | 0.98                              |                        |
|                        | (0.94, 1.43)        |                        | (0.79, 1.18)                    |                        | (0.80, 1.20)                      |                        |

|                      |              |      |              |      |              |      |
|----------------------|--------------|------|--------------|------|--------------|------|
| Q3                   | 1.33         |      | 1.08         |      | 0.94         |      |
|                      | (1.08, 1.62) |      | (0.88, 1.32) |      | (0.75, 1.17) |      |
| Q4                   | 1.20         |      | 1.06         |      | 0.84         |      |
|                      | (0.96, 1.51) |      | (0.84, 1.33) |      | (0.65, 1.08) |      |
| <b>Meta-analysis</b> |              |      |              |      |              |      |
| Q2                   | 1.14         | 0.78 | 0.97         | 0.92 | 0.88         | 0.34 |
|                      | (0.9, 1.37)  |      | (0.77, 1.16) |      | (0.70, 1.06) |      |
| Q3                   | 1.24         | 0.84 | 1.04         | 0.39 | 0.83         | 0.09 |
|                      | (0.98, 1.49) |      | (0.82, 1.26) |      | (0.63, 1.02) |      |
| Q4                   | 1.17         | 0.52 | 1.03         | 0.99 | 0.81         | 0.81 |
|                      | (0.90, 1.45) |      | (0.77, 1.28) |      | (0.60, 1.02) |      |

Adjustment of all models: region, sex of the child, allergic or asthmatic mother, parity (first child) and social class, predominant breastfeeding, maternal smoking status (during pregnancy and during the 1st year of life of the child) and day-care attendance during the first year of life.

<sup>#</sup>One child was excluded from the analysis with HCB because it was an outlier (N=1341).

†Two children had no information for PCBs within the Spanish population and one was excluded from the analysis with  $\Sigma$ PCBs because it was an outlier (N=1339).
